# Supplementary material for: Quinolinone and pyridopyrimidinone inhibitors of DNA-dependent protein kinase
Source: Royal Society of Chemistry journal article supplement (doi:10.1039/b705095j), 2007-01-01
Supplement: b705095j.pdf [file b705095j.pdf]

# Quinolinone and Pyridopyrimidinone Inhibitors of DNA-dependent Protein Kinase

Olivier R. Barbeau,<sup>†</sup> Celine Cano-Soumillac,<sup>†</sup> Roger J. Griffin,<sup>†</sup> Ian R. Hardcastle,<sup>†</sup> Graeme C. M. Smith,<sup>§</sup> Caroline Richardson,<sup>§</sup> William Clegg,<sup>‡</sup> Ross W. Harrington,<sup>‡</sup> and Bernard T. Golding<sup>†,‡,\*</sup>

## Supplementary Information

### Experimental procedures for compounds 2b-2g and 3b-3f

### Crystal structures of compounds 10a and 16

#### Experimental Procedures

#### 8-Substituted 2-morpholin-4-yl-quinolin-4-ones 2b-2g

These compounds were prepared using the typical procedure described in the Experimental Section of the paper and exemplified there for **2a**.

#### 2-Morpholin-4-yl-8-thiophen-3-yl-1*H*-quinolin-4-one (2b)

Thiophen-3-ylboronic acid (62 mg, 0.49 mmol) and 8-bromo-2-morpholin-4-yl-1*H*-quinolin-4-one (100 mg; 0.32 mmol) gave crude product that was purified by HPLC (aqueous methanol as eluent). The title compound was obtained as a red solid (37 mg, 37%):  $R_f = 0.10$  (ethyl acetate); mp: 115 °C (dec.);  $\lambda_{max}$  (EtOH)/nm 254; IR (cm<sup>-1</sup>) 3409, 3086, 2964, 2846, 1611, 1576, 1496, 1427, 1227, 1111, 1002, 825, 781, 757, 681; <sup>1</sup>H NMR, (300 MHz, CDCl<sub>3</sub>)  $\delta$  3.11 (4H, m, 2 x NCH<sub>2</sub>-morpholine), 3.69 (4H, m, 2 x OCH<sub>2</sub>-morpholine), 5.68 (1H, s, H-3), 7.12-7.21 (2H, m), 7.48-7.72 (3H, m), 8.06 (1H, s), 8.17-8.19 (1H, m, H-6); <sup>13</sup>C NMR, (75

MHz, CDCl<sub>3</sub>) δ 46.6, 66.4, 92.9, 123.4, 124.2, 124.8, 125.9, 128.3, 128.9, 132.5, 135.8, 137.4, 154.2; MS (ES<sup>+</sup>) *m/z* 312.97; Anal. Calcd for 0.87 mol C<sub>17</sub>H<sub>16</sub>N<sub>2</sub>O<sub>2</sub>S + 0.13 mol H<sub>2</sub>O: C, 63.12, H, 5.10, N, 8.48. Found: C, 63.10, H, 4.70, N, 8.60.

### **8-Benzo[*b*]thiophen-2-yl-2-morpholin-4-yl-1*H*-quinolin-4-one (2c)**

Benzothiophen-2-ylboronic acid (87 mg, 0.49 mmol) and 8-bromo-2-morpholin-4-yl-1*H*-quinolin-4-one (100 mg; 0.32 mmol) gave crude product that was purified by medium pressure chromatography using DCM-methanol (95:5 v/v) as eluent. The resulting material was further purified by medium pressure chromatography using ethyl acetate-DCM (80:20 v/v) as eluent. The title compound was obtained as a green solid (48 mg, 41%): R<sub>f</sub> = 0.33 (ethyl acetate); mp: 120 °C (dec.); λ<sub>max</sub> (EtOH)/nm 265; IR (cm<sup>-1</sup>) 3386, 2908, 2851, 1613, 1578, 1481, 1423, 1373, 1226, 1159, 1113, 1016, 978, 903, 801, 720; <sup>1</sup>H NMR, (300 MHz, CDCl<sub>3</sub>) δ 3.33 (4H, m, 2 x NCH<sub>2</sub>-morpholine), 3.62 (4H, dd, *J* = 5.1 and 4.5 Hz, 2 x OCH<sub>2</sub>-morpholine), 6.09 (1H, s, H-3), 7.17-7.39 (3H, m), 7.40-7.62 (2H, m) 7.72-7.82 (3H, m), 8.19 (1H, d, *J* = 7.0 Hz, H-5); <sup>13</sup>C NMR, (75 MHz, CDCl<sub>3</sub>) δ 46.6, 66.7, 92.6, 122.6, 123.61, 124.04, 125.04, 129.0, 129.2, 131.5, 132.4, 132.6, 132.7, 132.7, 132.9, 140.1, 141.2; MS (ES<sup>+</sup>) *m/z* 363.00; Anal. Calcd for 0.75 mol C<sub>21</sub>H<sub>18</sub>N<sub>2</sub>O<sub>2</sub>S + 0.25 mol DCM: C, 65.49, H, 4.82, N, 7.16. Found: C, 65.85, H, 4.78, N, 6.56.

### **8-Biphenyl-3-yl-2-morpholin-4-yl-1*H*-quinolin-4-one (2d)**

Biphenyl-3-ylboronic acid (96 mg, 0.49 mmol) and 8-bromo-2-morpholin-4-yl-1*H*-quinolin-4-one (100 mg; 0.32 mmol) gave crude product that was purified by medium pressure chromatography using ethyl acetate-DCM (90:10 v/v) as eluent. The title compound was obtained as a yellow solid (87 mg, 70%): R<sub>f</sub> = 0.10 (ethyl acetate); mp: 120 °C (dec.); λ<sub>max</sub> (EtOH)/nm 252; IR (cm<sup>-1</sup>) 3409, 2959, 2848, 1612, 1576, 1481, 1431, 1296, 1224, 1113, 1069,

997, 908, 754;  $^1\text{H}$  NMR, (300 MHz,  $\text{CDCl}_3$ )  $\delta$  3.13 (4H, m, 2 x  $\text{NCH}_2$ -morpholine), 3.70 (4H, m, 2 x  $\text{OCH}_2$ -morpholine), 5.78 (1H, s, H-3), 7.28-7.47 (5H, m), 7.47-7.72 (6H, m), 8.14 (1H, m), 8.32 (1H, m, H-5);  $^{13}\text{C}$  NMR, (75 MHz,  $\text{CDCl}_3$ )  $\delta$  46.7, 66.3, 92.9, 122.7, 123.6, 124.2, 125.9, 127.4, 127.5, 127.8, 128.0, 128.5, 129.0, 129.2, 129.4, 129.8, 130.5, 132.7, 135.6, 137.4, 140.3, 143.2, 154.3, 178.9; MS (ES+)  $m/z$  383.09; Anal. Calcd for 0.79 mol  $\text{C}_{25}\text{H}_{22}\text{N}_2\text{O}_2$  + 0.21 mol DCM: C, 74.94, H, 5.68, N, 6.84. Found: C, 75.06, H, 5.51, N, 6.82.

### **8-Dibenzofuran-4-yl-2-morpholin-4-yl-1*H*-quinolin-4-one (2e)**

Dibenzofuran-4-ylboronic acid (103 mg, 0.49 mmol) and 8-bromo-2-morpholin-4-yl-1*H*-quinolin-4-one (100 mg; 0.32 mmol) gave crude product that was purified by HPLC (aqueous methanol as eluent). The title compound was obtained as a red solid (49 mg, 38%):  $R_f$  = 0.06 (ethyl acetate); mp: 117-118 °C (dec.);  $\lambda_{\text{max}}$  (EtOH)/nm 288; IR ( $\text{cm}^{-1}$ ) 3419, 2852, 1610, 1578, 1497, 1442, 1405, 1226, 1184, 1112, 998, 795, 722;  $^1\text{H}$  NMR, (300 MHz,  $\text{CDCl}_3$ )  $\delta$  2.93 (4H, m, 2 x  $\text{NCH}_2$ -morpholine); 3.50 (4H, m, 2 x  $\text{OCH}_2$ -morpholine), 5.69 (1H, s, H-3), 7.19-7.45 (6H, m), 7.64 (1H, m), 7.95 (3H, m), 8.30 (1H, d,  $J$  = 6.1 Hz, H-5);  $^{13}\text{C}$  NMR, (75 MHz,  $\text{CDCl}_3$ )  $\delta$  46.9, 66.3, 92.2, 112.1, 121.4, 121.8, 123.4, 123.9, 124.4, 125.8, 126.7, 128.5, 129.1, 133.8, 136.0, 153.3, 154.4, 156.3, 178.9; MS (ES+)  $m/z$  396.98; HRMS calcd for  $\text{C}_{25}\text{H}_{20}\text{N}_2\text{O}_3$   $[\text{M}+\text{H}]^+$  397.1547, found 397.1549.

### **8-Dibenzothiophene-4-yl-2-morpholin-4-yl-1*H*-quinolin-4-one (2f)**

Dibenzothiophen-4-ylboronic acid (53 mg, 0.23 mmol) and 8-bromo-2-morpholin-4-yl-1*H*-quinolin-4-one (65 mg, 0.21 mmol) gave crude product that was purified by medium pressure chromatography using DCM-methanol (95:5 v/v) as eluent to remove the phosphines. The resulting material was further purified by HPLC (aqueous methanol as eluent). Starting material (11 mg, 16%) was recovered and the title compound was obtained as a white solid

(20 mg, 27%):  $R_f = 0.28$  (MeOH-DCM 1:19); mp: 151-152 °C (dec.);  $\lambda_{\max}$  (EtOH)/nm 233; IR ( $\text{cm}^{-1}$ ) 2362, 2331, 1612, 1576, 1496, 1435, 1227, 1116, 997;  $^1\text{H}$  NMR, (300 MHz,  $\text{CDCl}_3$ )  $\delta$  2.93 (4H, dd,  $J = 4.7$  and 4.8 Hz, 2 x  $\text{CH}_2\text{N}$ -morpholine), 3.57 (4H, dd,  $J = 4.7$  and 4.8 Hz, 2 x  $\text{CH}_2\text{O}$ -morpholine), 5.68 (1H, s, H-3), 7.31-7.76 (7H, m), 8.14-8.35 (3H, m);  $^{13}\text{C}$  NMR, (75 MHz,  $\text{CDCl}_3$ )  $\delta$  46.9, 66.2, 93.4, 122.4, 122.5, 123.3, 123.4, 124.6, 125.3, 125.8, 126.9, 127.7, 127.9, 131.2, 132.6, 135.6, 135.8, 137.4, 139.8, 140.7, 154.2, 178.8; MS (ES+)  $m/z$  413.10; Anal. Calcd for 2.0 mol  $\text{C}_{25}\text{H}_{20}\text{N}_2\text{O}_2\text{S}$  + 0.3 mol  $\text{H}_2\text{O}$ : C, 68.32, H, 5.27, N, 6.37. Found: C, 68.11, H, 4.70, N, 6.21.

### **8-(4-Hydroxymethylphenyl)-2-morpholin-4-yl-1H-quinolin-4-one (2g)**

4-Hydroxymethylphenylboronic acid (74 mg; 0.49 mmol) and 8-bromo-2-morpholin-4-yl-1H-quinolin-4-one (100 mg, 0.32 mmol) gave crude product that was purified by medium pressure chromatography using DCM-methanol (95:5 v/v) as eluent. The title compound was obtained as a brown solid (24 mg, 22%):  $R_f = 0.08$  (MeOH-DCM 1:19); mp: 259-260 °C (dec.);  $\lambda_{\max}$  (EtOH)/nm 251; IR ( $\text{cm}^{-1}$ ) 3409; 2854; 1611; 1578; 1427; 1363; 1229; 1110; 1041; 995; 785;  $^1\text{H}$  NMR (300 MHz,  $\text{CDCl}_3$ )  $\delta$  3.13 (4H, m,  $\text{CH}_2\text{N}$ -morpholine); 3.72 (4H, m,  $\text{CH}_2\text{O}$ -morpholine); 4.83 (2H, s,  $\text{CH}_2\text{OH}$ ); 5.75 (1H, s, H-3); 7.28-7.56 (6H, m); 8.03 (1H, s, OH); 8.25 (1H, d,  $J = 7.0$  Hz, H-5);  $^{13}\text{C}$  NMR, (75 MHz,  $\text{CDCl}_3$ )  $\delta$  46.7; 66.3; 92.9; 123.5; 124.1; 125.6; 127.3; 127.9; 128.5; 129.5; 132.7; 135.5; 140.2; 140.8; 142.5; 154.4; 179.0; MS (ES+)  $m/z$  337.02; Anal. Calcd for 0.93 mol  $\text{C}_{20}\text{H}_{20}\text{N}_2\text{O}_3$  + 0.07 mol DCM: C, 70.28, H, 5.95, N, 8.13. Found: C, 70.28, H, 5.98, N, 7.83.

### **9-Substituted 2-morpholin-4-yl-pyrido[1,2-*a*]pyrimidin-4-ones 3b-3f**

These compounds were prepared using the typical procedure described in the Experimental Section of the paper and exemplified there for **3a**.

**2-Morpholin-4-yl-9-thiophen-3-yl-pyrido[1,2-*a*]pyrimidin-4-one (3b)**

Thiophen-3-ylboronic acid (51 mg, 0.40 mmol) and 9-hydroxy-2-morpholin-4-yl-pyrido[1,2-*a*]pyrimidin-4-one 9-*O*-triflate (100 mg, 0.26 mmol) gave crude product that was purified by medium pressure chromatography using ethyl acetate-DCM (70:30 v/v) as eluent. The title compound was obtained as white needles (40 mg, 39%):  $R_f = 0.16$  (MeOH-DCM 1:19); mp: 222-223 °C (dec.);  $\lambda_{\max}$  (EtOH)/nm 278; IR ( $\text{cm}^{-1}$ ) 3078, 2991, 2908, 2862, 1689, 1624, 1541, 1492, 1438, 1362, 1229, 1201, 1110, 1002, 763;  $^1\text{H}$  NMR, (300 MHz,  $\text{CDCl}_3$ )  $\delta$  3.63 (4H, m, 2 x  $\text{NCH}_2$ -morpholine), 3.79 (4H, m, 2 x  $\text{OCH}_2$ -morpholine), 5.68 (1H, s, H-3), 6.97 (1H, dd,  $J = 7.0$  and 7.1 Hz, H-7), 7.38-7.42 (1H, m), 7.55 (1H, dd,  $J = 7.1$  Hz and 1.3 Hz, H-8), 7.80 (2H, m), 8.96 (1H, dd,  $J = 7.0$  Hz and 1.3 Hz, H-6);  $^{13}\text{C}$  NMR, (75 MHz,  $\text{CDCl}_3$ )  $\delta$  45.1, 67.0, 81.5, 112.8, 125.2, 125.6, 127.1, 129.1, 130.7, 135.8, 137.2, 159.4, 161.0; MS (ES+)  $m/z$  314.08; Anal. Calcd for 0.8 mol  $\text{C}_{16}\text{H}_{15}\text{N}_3\text{O}_3\text{S}$  + 0.2 mol  $\text{H}_2\text{O}$ : C, 60.45, H, 4.91, N, 13.22. Found: C, 60.59, H, 4.68, N, 13.11.

**9-Benzo[*b*]thiophen-2-yl-2-morpholin-4-yl-pyrido[1,2-*a*]pyrimidin-4-one (3c)**

Benzo[*b*]thiophen-2-ylboronic acid (70 mg, 0.40 mmol) and 9-hydroxy-2-morpholin-4-yl-pyrido[1,2-*a*]pyrimidin-4-one 9-*O*-triflate (100 mg, 0.26 mmol) gave crude product that was recrystallised from ethanol. Further purification was achieved by medium pressure chromatography using DCM-methanol (98:2 v/v) as eluent. The title compound was obtained as a yellow solid (24 mg, 20%):  $R_f = 0.16$  (MeOH-DCM 1:19); mp: 252-253 °C (dec.);  $\lambda_{\max}$  (EtOH)/nm 289; IR ( $\text{cm}^{-1}$ ) 3057, 2866, 1691, 1619, 1537, 1496, 1422, 1230, 1108, 765;  $^1\text{H}$  NMR, (300 MHz,  $\text{CDCl}_3$ )  $\delta$  3.84 (8H, m, 4 x  $\text{CH}_2$  morpholine), 5.70 (1H, s, H-3), 7.01 (1H, dd,  $J = 7.0$  and 7.1 Hz, H-7), 7.28-7.44 (2H, m), 7.84-7.92 (3H, m), 8.08 (1H, dd,  $J = 7.0$  Hz and 1.6 Hz, H-8), 9.01 (1H, dd,  $J = 7.1$  Hz and 1.6 Hz, H-6);  $^{13}\text{C}$  NMR, (75 MHz,  $\text{CDCl}_3$ )  $\delta$  45.7, 67.0, 81.7, 112.7, 112.7, 122.4, 124.1, 124.2, 124.9, 125.3, 127.9, 135.9, 138.1, 139.1,

160.7; MS (ES+)  $m/z$  364.07; Anal. Calcd for 0.66 mol C<sub>20</sub>H<sub>17</sub>N<sub>3</sub>O<sub>2</sub>S + 0.33 mol H<sub>2</sub>O: C, 64.50, H, 4.87, N, 11.28. Found: C, 64.54, H, 4.53, N, 11.10.

### **9-Biphenyl-3-yl-2-morpholin-4-yl-pyrido[1,2-*a*]pyrimidin-4-one (3d)**

3-Biphenylboronic acid (78 mg, 0.39 mmol) and 9-hydroxy-2-morpholin-4-yl-pyrido[1,2-*a*]pyrimidin-4-one 9-*O*-triflate (100 mg, 0.26 mmol) gave crude product that was purified by medium pressure chromatography using DCM-methanol (98:2 v/v) as eluent, followed by a recrystallisation from methanol. The title compound was obtained as a white solid (60 mg, 59%):  $R_f$  = 0.29 (MeOH-DCM 1:19); mp: 191-192 °C;  $\lambda_{max}$  (EtOH)/nm 275; IR (cm<sup>-1</sup>) 2870, 1692, 1627, 1541, 1496, 1431, 1371, 1334, 1304, 1263, 1233, 1157, 1113, 1072, 997, 899, 854, 749, 688; <sup>1</sup>H NMR, (300 MHz, CDCl<sub>3</sub>)  $\delta$  3.56 (4H, m, 2 x N-CH<sub>2</sub>-morpholine), 3.67 (4H, m, 2 x O-CH<sub>2</sub>-morpholine), 5.68 (1H, s, H-3), 7.01 (1H, dd,  $J$  = 7.0 and 7.1 Hz, H-7), 7.28-7.75 (9H, m), 7.95 (1H, s), 9.00 (1H, d,  $J$  = 7.1 Hz, H-6); <sup>13</sup>C NMR, (75 MHz, CDCl<sub>3</sub>)  $\delta$  44.9, 66.9, 81.3, 113.0, 127.3, 127.4, 127.6, 127.9, 128.9, 129.0, 129.3, 129.4, 135.8, 136.8, 137.6, 141.2, 149.5, 159.5; MS (ES+)  $m/z$  384.17; HRMS calcd for C<sub>24</sub>H<sub>21</sub>N<sub>3</sub>O<sub>2</sub> [M+H]<sup>+</sup> 384.1707, found 384.1704.

### **9-Dibenzofuran-4-yl-2-morpholin-4-yl-pyrido[1,2-*a*]pyrimidin-4-one (3e)**

Dibenzofuran-4-ylboronic acid (84 mg, 0.40 mmol) and 9-hydroxy-2-morpholin-4-yl-pyrido[1,2-*a*]pyrimidin-4-one 9-*O*-triflate (100 mg, 0.26 mmol) gave crude product that was purified by HPLC (aqueous acetonitrile as eluent). The title compound was obtained as a white solid (36 mg, 28%):  $R_f$  = 0.18 (ethyl acetate); mp: 258-260 °C (dec.);  $\lambda_{max}$  (EtOH)/nm 279; IR (cm<sup>-1</sup>) 2859, 2362, 1699, 1625, 1544, 1496, 1435, 1366, 1236, 1118; <sup>1</sup>H NMR, (300 MHz, CDCl<sub>3</sub>)  $\delta$  3.35 (4H, m, 2 x NCH<sub>2</sub>-morpholine), 3.54 (4H, m, 2 x OCH<sub>2</sub>-morpholine), 5.66 (1H, s, H-3), 7.08 (1H, dd,  $J$  = 7.0 and 7.0 Hz, H-7), 7.38-7.51 (4H, m), 7.67 (1H, dd,  $J$  =

7.0 Hz and 1.3 Hz, H-8), 7.94 (1H, dd,  $J = 7.0$  Hz and 1.6 Hz), 8.01-8.05 (2H, m), 9.06 (1H, dd,  $J = 7.0$  Hz and 1.3 Hz, H-6);  $^{13}\text{C}$  NMR, (75 MHz,  $\text{CDCl}_3$ )  $\delta$  44.8, 66.8, 81.4, 112.0, 112.7, 121.1, 121.8, 122.8, 123.3, 124.4, 124.9, 127.8, 128.0, 129.3, 131.4, 138.1, 156.3, 159.5, 160.7; MS (ES+)  $m/z$  398.15; Anal. Calcd for 0.83 mol  $\text{C}_{24}\text{H}_{19}\text{N}_3\text{O}_3$  + 0.17 mol  $\text{H}_2\text{O}$ : C, 71.88, H, 4.88, N, 10.48. Found: C, 71.93, H, 4.73, N, 10.34.

### 9-Dibenzothiophene-4-yl-2-morpholin-4-yl-pyrido[1,2-*a*]pyrimidin-4-one (3f).

Dibenzothiophen-4-ylboronic acid (107 mg, 0.46 mmol) and 9-hydroxy-2-morpholin-4-yl-pyrido[1,2-*a*]pyrimidin-4-one 9-*O*-triflate (160 mg, 0.42 mmol) gave crude product that was purified by medium pressure chromatography using DCM-methanol (95:5 v/v) as eluent to remove the phosphines. This was followed by a recrystallisation from ethyl acetate to afford the title compound as a white solid (66 mg, 38%):  $R_f = 0.30$  (MeOH-DCM 1:19); mp: 203-204 °C;  $\lambda_{\text{max}}$  (EtOH)/nm 277; IR ( $\text{cm}^{-1}$ ) 2851, 1690, 1620, 1542, 1431, 1219, 1113, 742;  $^1\text{H}$  NMR, (300 MHz,  $\text{CDCl}_3$ )  $\delta$  3.36 (4H, m, 2 x N- $\text{CH}_2$ -morpholine), 3.56 (4H, m, 2 x O- $\text{CH}_2$ -morpholine), 5.64 (1H, s, H-3), 7.01 (1H, dd,  $J = 7.0$  and 7.1 Hz, H-7), 7.45-7.49 (2H, m), 7.56-7.57 (2H, m), 7.79-7.82 (1H, m), 7.87 (1H, dd,  $J = 7.1$  and 1.5 Hz, H-8), 8.19-8.23 (2H, m), 9.04 (1H, dd,  $J = 7.0$  and 1.5 Hz, H-6);  $^{13}\text{C}$  NMR, (75 MHz,  $\text{CDCl}_3$ )  $\delta$  44.8, 66.8, 81.4, 112.5, 121.7, 122.1, 122.9, 124.6, 124.9, 127.4, 128.3, 128.9, 132.4, 134.8, 135.9, 136.4, 137.5, 139.6, 140.1, 148.8, 159.4, 160.5; MS (ES+)  $m/z$  414.04  $\text{M}^+$ ; Anal. Calcd for 0.83 mol  $\text{C}_{19}\text{H}_{18}\text{N}_2\text{O}_2\text{S}$  + 0.17 mol DCM: C, 67.64, H, 4.61, N, 9.70. Found: C, 67.73, H, 4.37, N, 9.72.

### X-ray Crystallography

*Crystal data for 10a*:  $\text{C}_{17}\text{H}_{22}\text{BrN}_3\text{O}_3$ ,  $M = 396.3$ , monoclinic, space group  $P2_1/c$ ,  $a = 7.8129(4)$ ,  $b = 28.2692(13)$ ,  $c = 7.6955(3)$  Å,  $\beta = 99.413(1)^\circ$ ,  $V = 1676.78(13)$  Å<sup>3</sup>,  $Z = 4$ ,  $T = 150$  K; 14873 reflections measured, 4117 unique ( $R_{\text{int}} = 0.028$ ), 218 parameters,  $R(F, F^2) >$

$2\sigma$ ) = 0.033,  $R_w (F^2, \text{all data}) = 0.083$ , difference map features within  $\pm 0.61 \text{ e } \text{\AA}^{-3}$ . *Crystal data for 16*:  $\text{C}_{13}\text{H}_{12}\text{F}_3\text{N}_3\text{O}_5\text{S}$ ,  $M = 379.3$ , monoclinic, space group  $P2_1/c$ ,  $a = 20.220(9)$ ,  $b = 16.889(7)$ ,  $c = 23.103(10) \text{ \AA}$ ,  $\beta = 110.821(7)^\circ$ ,  $V = 7374(6) \text{ \AA}^3$ ,  $Z = 20$ ,  $T = 120 \text{ K}$ ; 60275 reflections measured, 15066 unique ( $R_{\text{int}} = 0.065$ ), 1127 parameters,  $R (F, F^2 > 2\sigma) = 0.047$ ,  $R_w (F^2, \text{all data}) = 0.128$ , difference map features within  $\pm 0.52 \text{ e } \text{\AA}^{-3}$ . Data were collected on Bruker SMART CCD diffractometers with Mo  $K\alpha$  radiation ( $\lambda = 0.71073 \text{ \AA}$ ) for **10a**, and with synchrotron radiation ( $\lambda = 0.6898 \text{ \AA}$ ) at the CCLRC Daresbury Laboratory SRS Station 9.8 for **16**. Standard programs (Bruker SMART, SAINT, SADABS and SHELXTL) were used for data collection and processing, absorption corrections, structure solution and refinement.

CCDC reference numbers 647931 and 647932.

See <http://www.rsc.org/suppdata/ob/b7/b705095j/> for crystallographic data in .cif or other electronic format.



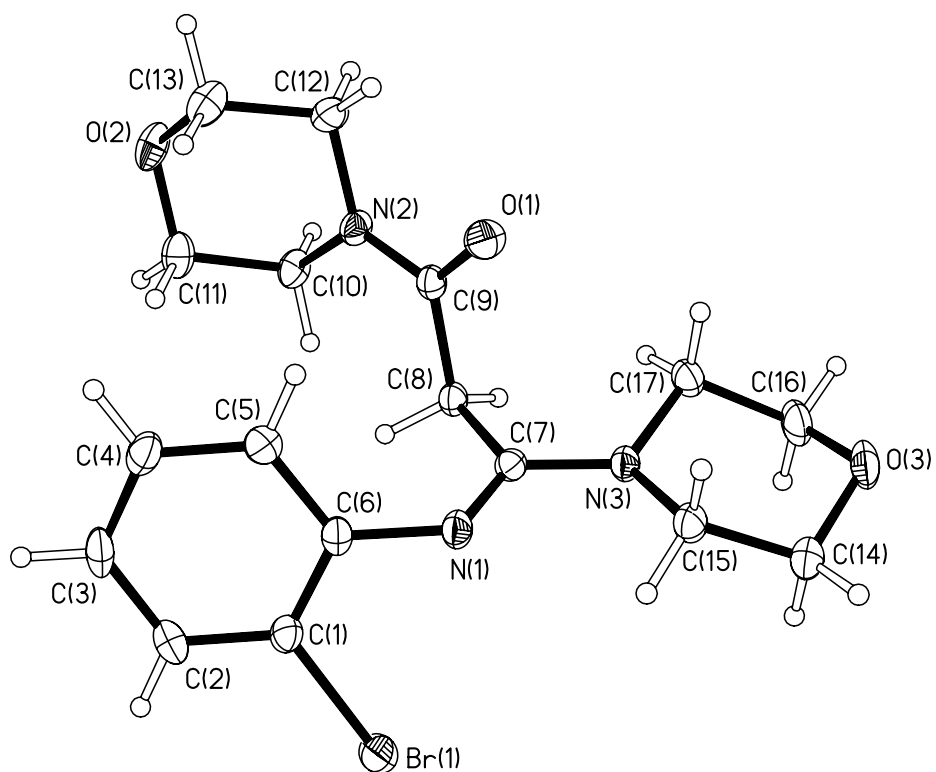

**Fig. 1.** The molecular structure of **10a** with 50% probability displacement ellipsoids.

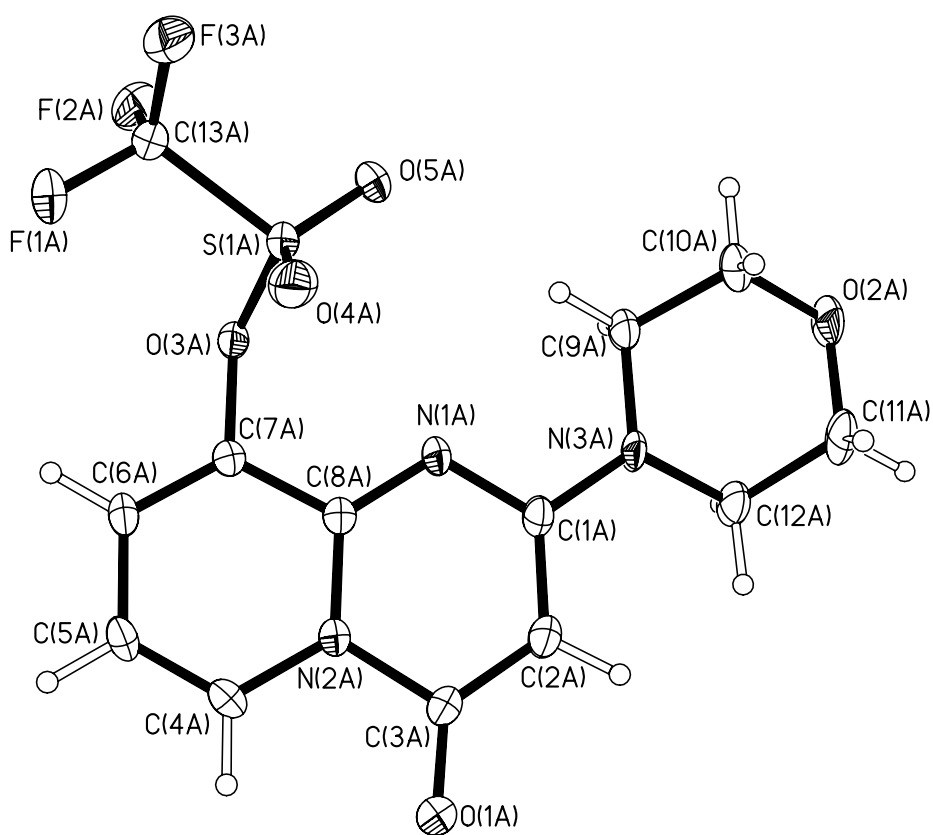

**Fig. 2.** The molecular structure of **16** with 50% probability displacement ellipsoids.

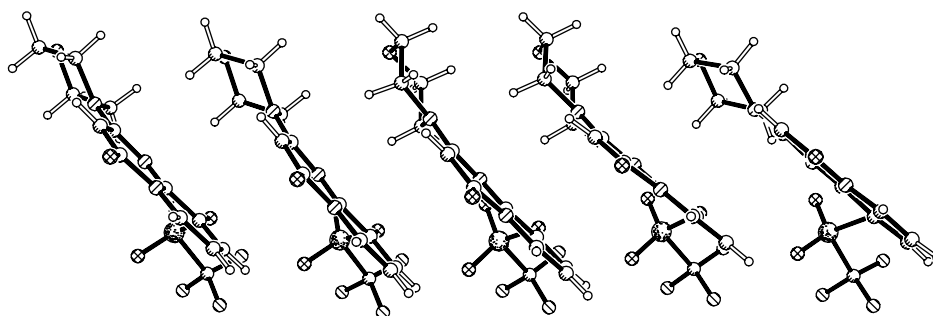

**Fig. 3.** The five independent molecules in the asymmetric unit of **16**, showing their very similar conformations and orientations and their stacking.
